# Supplementary material for: A novel electromagnet-triggered pillar valve and its application in immunoassay on a centrifugal platform
Source: Royal Society of Chemistry journal article supplement (doi:10.1039/c9lc00043g), 2019-01-01
Supplement: c9lc00043g1.pdf [file c9lc00043g1.pdf]

## A novel electromagnet-triggered pillar valve and its application in immunoassay on centrifugal platform

### Supplementary materials

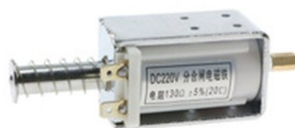

The electromagnet with an iron bar

**Figure S1.** The electromagnet used to trigger the ETP valve. It can control the movement of the iron bar on it.

|                 |                 |           |           |                 |                 |
|-----------------|-----------------|-----------|-----------|-----------------|-----------------|
| Cy3-BSA         | Cy3-BSA         | Mouse-IgG | Mouse-IgG | Printing buffer | Printing buffer |
| Cy3-BSA         | Cy3-BSA         | Mouse-IgG | Mouse-IgG | Printing buffer | Printing buffer |
| T-2-BSA         | T-2-BSA         | T-2-BSA   | AFB1-BSA  | AFB1-BSA        | AFB1-BSA        |
| T-2-BSA         | T-2-BSA         | T-2-BSA   | AFB1-BSA  | AFB1-BSA        | AFB1-BSA        |
| OTA-BSA         | OTA-BSA         | OTA-BSA   | ZEN-BSA   | ZEN-BSA         | ZEN-BSA         |
| OTA-BSA         | OTA-BSA         | OTA-BSA   | ZEN-BSA   | ZEN-BSA         | ZEN-BSA         |
| Printing buffer | Printing buffer | Mouse-IgG | Mouse-IgG | Cy3-BSA         | Cy3-BSA         |
| Printing buffer | Printing buffer | Mouse-IgG | Mouse-IgG | Cy3-BSA         | Cy3-BSA         |

**Figure S2.** Printing design of the microarray for immunoassay, consisted of the optimal concentration of each complete antigen and three controls (Cy3-BSA, blank, and mouse-IgG).

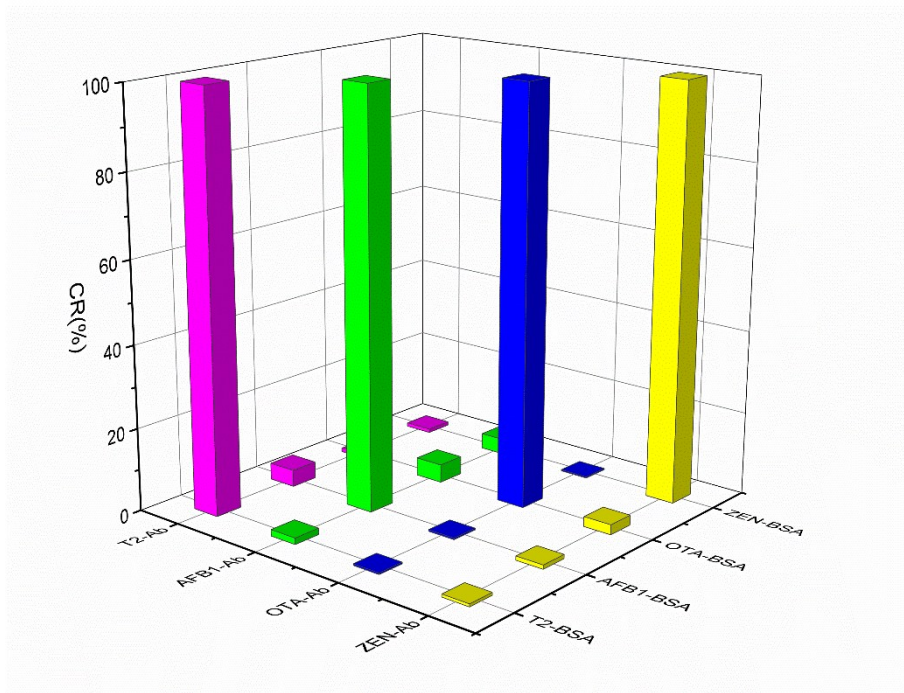

**Figure S3.** Cross-reactivities among the four antigens and antibodies.

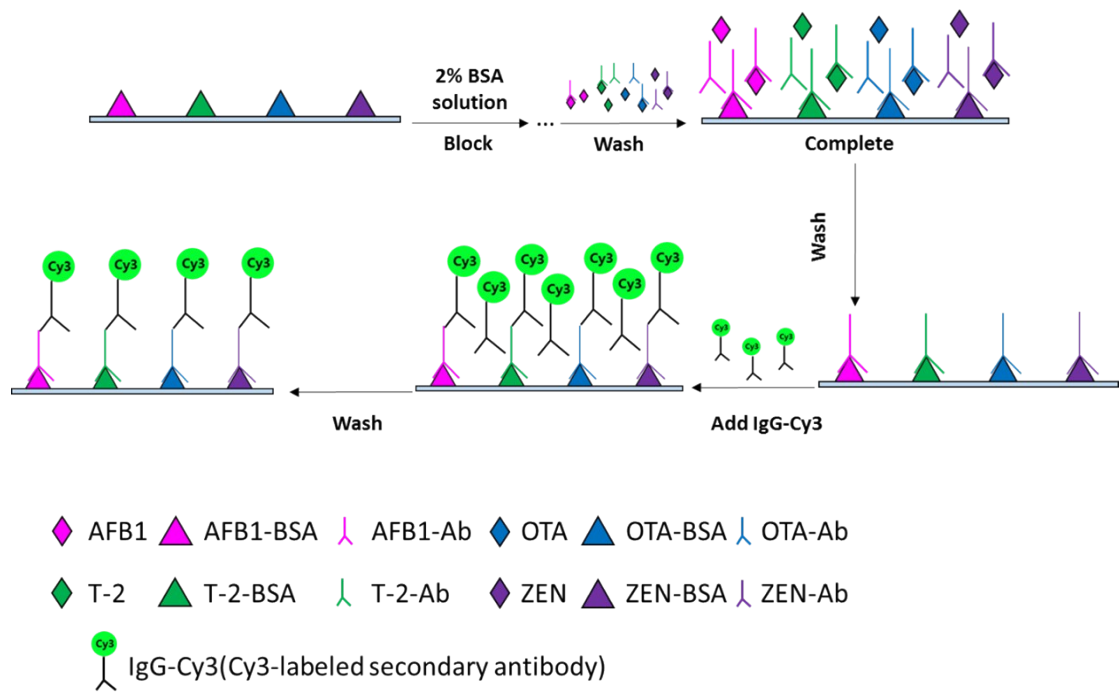

**Figure S4.** Schematic illustration of indirect competitive immunoassay for simultaneous and rapid detection of four mycotoxins.

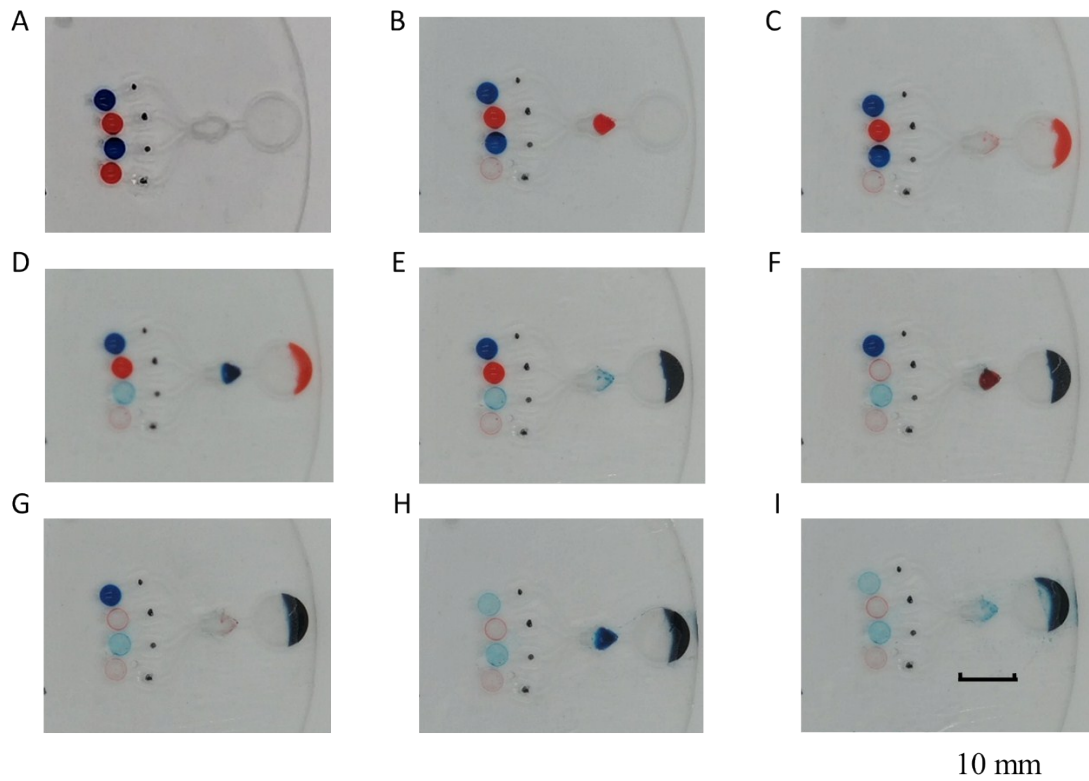

**Figure S5.** Work flow of the chip. The entire process is as follow: (A) The chip is fixed on the device. (B-C) The process of the first hybridization step. (D-E) The process of the first washing step. (F-G) The process of the second hybridization step. (H-I) The process of the second washing step. Each part consists of two steps: First, the sample, antibody solutions and washing buffer is centrifuged to the reaction chamber. Second, after the reaction or washing process, the liquid is centrifuged to the waste chamber.

**Table S1.** The values of force to open the EPT valves with different tapes. The forces were recorded by the counterweights that the valves can maintain or the electromagnet can lift.

| Brand                                | Product number | Maximum tolerance force | Force of electromagnet |
|--------------------------------------|----------------|-------------------------|------------------------|
| Adhesive Research<br>(Glen Rock, PA) | 90697          | 2.1 N                   |                        |
| 3M<br>(St. Paul, MN )                | 9795R          | 1.9 N                   | 5 N                    |
| Youbisheng<br>(Suzhou, China)        | 3715           | 2.4 N                   |                        |

**Table S2.** Weight loss of pure water sealed on the chip.

| Time (month) | Chip 1 | Chip 2 | Chip 3 | Chip 4 | Average       |
|--------------|--------|--------|--------|--------|---------------|
| 0            | 0      | 0      | 0      | 0      | 0             |
| 1            | 0.90%  | 0.96%  | 0.99%  | 1.03%  | 0.97% ± 0.05% |
| 2            | 2.42%  | 2.46%  | 2.31%  | 2.60%  | 2.45% ± 0.12% |
| 3            | 3.20%  | 3.14%  | 3.69%  | 3.04%  | 3.27% ± 0.29% |

**Table S3.** Workflow of the immunoassay chip.

| <b>Step</b> | <b>Rotation speed</b> | <b>Time duration</b> | <b>Operation</b>                       |
|-------------|-----------------------|----------------------|----------------------------------------|
| 1           | 0                     | 10 s                 | Open the first ETP valve               |
| 2           | 800 rpm               | 20 min               | The first hybridization                |
| 3           | 3000 rpm              | 10 s                 | Discard the waste to the waste chamber |
| 4           | 0                     | 10 s                 | Open the second ETP valve              |
| 5           | 800 rpm               | 20 min               | The first washing step                 |
| 6           | 3000 rpm              | 10 s                 | Discard the waste to the waste chamber |
| 7           | 0                     | 10 s                 | Open the third ETP valve               |
| 8           | 800 rpm               | 20 min               | The second hybridization               |
| 9           | 3000 rpm              | 10 s                 | Discard the waste to the waste chamber |
| 10          | 0                     | 10 s                 | Open the fourth ETP valve              |
| 11          | 800 rpm               | 20 min               | The second washing step                |
| 12          | 3000 rpm              | 10 s                 | Discard the waste to the waste chamber |
| 13          | 0                     | 10 s                 | Signal detection                       |

**Table S4.** Standard ranges for the mycotoxins.

| Mycotoxin | Concentration of five standards (ng/mL) |      |    |    |    |
|-----------|-----------------------------------------|------|----|----|----|
|           | 0                                       | 0.5× | 1× | 2× | 4× |
| T-2       | 0                                       | 1    | 2  | 4  | 8  |
| AFB1      | 0                                       | 1    | 2  | 4  | 8  |
| OTA       | 0                                       | 4    | 8  | 16 | 32 |
| ZEN       | 0                                       | 3    | 6  | 12 | 24 |
